# Supplementary material for: Abundant expression of somatic transposon-derived piRNAs throughout Tribolium castaneum embryogenesis
Source: PubMed Central journal article supplement (PMC5613491; doi:10.1186/s13059-017-1304-1), 2017-09-26

Figure S3

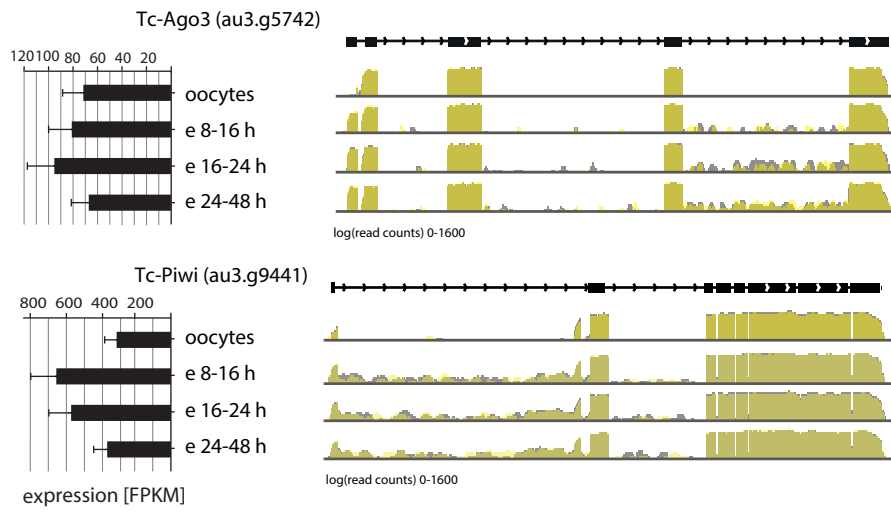

Supplement: 13059_2017_1304_MOESM4_ESM.pdf [file 13059_2017_1304_MOESM4_ESM.pdf]
